## Molecular mechanisms for intestinal $\text{HCO}_3^-$ secretion and its regulation by guanylin in seawater-acclimated eels

Yoshio Takei<sup>\*</sup>, Marty K.S. Wong, and Masaaki Ando

Laboratory of Physiology, Atmosphere and Ocean Research Institute, the University of Tokyo,  
Kashiwa, Chiba 277-8564, Japan

Running title: Guanylin and  $\text{HCO}_3^-$  secretion in teleost intestine

\* To whom correspondence should be addressed at [takei@ori.u-tokyo.ac.jp](mailto:takei@ori.u-tokyo.ac.jp)

## Abstract

The intestine of marine teleosts secretes  $\text{HCO}_3^-$  into the lumen and precipitates  $\text{Ca}^{2+}$  and  $\text{Mg}^{2+}$  in the imbibed seawater as carbonates to decrease luminal fluid osmolality and facilitate water absorption. However, reports on studies on the hormonal regulation of  $\text{HCO}_3^-$  secretion are just emerging. Here, we showed that guanylin (GN) applied to the mucosal side of intestinal epithelia increased  $\text{HCO}_3^-$  secretion in seawater-acclimated eels. The effect of GN on  $\text{HCO}_3^-$  secretion was slower than that on the short-circuit current, and the time-course of the GN effect was similar to that of bumetanide. Mucosal bumetanide and serosal 4,4'-dinitrostilbene-2,2'-disulfonic acid (DNDS) inhibited the GN effect, suggesting an involvement of apical  $\text{Na}^+ - \text{K}^+ - 2\text{Cl}^-$  cotransporter (NKCC2) and basolateral  $\text{Cl}^- / \text{HCO}_3^-$  exchanger (AE)/ $\text{Na}^+ - \text{HCO}_3^-$  cotransporter (NBC) in the GN effect. However, mucosal DNDS and diphenylamine-2-carboxylic acid (DPC) failed to inhibit the GN effect, showing that apical AE and  $\text{Cl}^-$  channel are not involved. To identify molecular species of possible transporters involved in the GN effect, we performed RNA-seq analyses followed by quantitative real-time PCR after transfer of eels to seawater. Among the genes upregulated after seawater transfer, those of *Slc26a3a*, *b* (DRAa, *b*) and *Slc26a6a*, *c* (Pat-1a, *c*) on the apical membrane of the intestinal epithelial cells, and those of *Slc4a4a* (NBCe1a), *Slc4a7* (NBCn1), *Slc4a10a* (NBCn2a) and *Slc26a1* (Sat-1) on the basolateral membrane were candidate transporters involved in  $\text{HCO}_3^-$  secretion. Judging from the slow effect of GN, we suggest that GN inhibits NKCC2b on the apical membrane and decreases cytosolic  $\text{Cl}^-$  and  $\text{Na}^+$ , which then activates apical DNDS-insensitive DRAa, *b* and basolateral DNDS-sensitive NBCe1a, n1, n2a to enhance transcellular  $\text{HCO}_3^-$  flux across the intestinal epithelia of seawater-acclimated eels.

Abbreviations: AE, anion exchanger; CA, carbonic anhydrase; CFTR, cystic fibrosis transmembrane conductance regulator; DIDS, 4,4'-diisothiocyano-2,2'-disulfonic acid; DMSO, dimethyl sulfoxide; DNDS, 4,4'-dinitrostilbene-2,2'-disulfonic acid; DPC, diphenylamine-2-carboxylic acid, DRA, down-regulated in adenoma; FW, fresh water; GN, guanylin; I<sub>sc</sub>, short-circuit current; NBC,  $\text{Na}^+ - \text{HCO}_3^-$  cotransporter; NCC,  $\text{Na}^+ - \text{Cl}^-$  cotransporter; NKA,  $\text{Na}^+ / \text{K}^+ - \text{ATPase}$ ; NKCC,  $\text{Na}^+ - \text{K}^+ - 2\text{Cl}^-$  cotransporter; Pat-1, Putative anion transporter-1; PD, potential difference; Sat-1, Sulfate transporter-1; Slc, Solute Carrier; SW, seawater

## Introduction

Marine teleosts drink seawater (SW) copiously and absorb >80% of imbibed SW across the intestine to compensate for osmotic water loss in the hypertonic environment (Grosell, 2011). The ingested SW is diluted to isotonicity by coordinated actions of NaCl removal by the esophagus (Hirano and Meyer-Gostan, 1976; Parmelee and Renfro, 1983; Takei et al., 2017) and  $\text{Ca}^{2+}/\text{Mg}^{2+}$  removal by precipitation as carbonate (Grosell et al., 2009b; Wilson et al., 2009; Faggio et al., 2011). Water is then absorbed by the intestine in parallel with NaCl absorption from diluted SW (Grosell, 2011). The molecular mechanisms for NaCl absorption across the intestinal epithelia have been well characterized in a few teleost species;  $\text{Na}^+-\text{K}^+-\text{Cl}^-$  cotransporter 2 (NKCC2 or Slc12a1) is the major player for NaCl uptake on the apical membrane of enterocytes and  $\text{Na}^+/\text{K}^+-\text{ATPase}$  (NKA) and unidentified  $\text{Cl}^-$  channel on the basolateral membrane transport NaCl into the extracellular fluid (Cutler and Cramb, 2008; Gregório et al., 2013; Ando et al., 2014; Esbaugh and Cutler, 2016). The molecular mechanism for  $\text{HCO}_3^-$  secretion has also been investigated in the intestine of marine teleosts (Grosell, 2011). The major transporter for  $\text{HCO}_3^-$  secretion on the apical membrane was identified as Pat-1 (Putative anion transporter-1)/Slc26a6 and that for  $\text{HCO}_3^-$  uptake on the basolateral side was suggested as electrogenic  $\text{Na}^+-\text{HCO}_3^-$  cotransporter (NBCe1/Slc4a4) because of upregulation of these genes after high salinity acclimation in the pufferfish (Kurita et al., 2008), toadfish (Grosell et al., 2009b; Taylor et al., 2010) and seabream (Gregório et al., 2013). The combination of these transporters accomplishes transcellular  $\text{HCO}_3^-$  secretion.

Intestinal ion and water transport is regulated by various hormones (Takei and Loretz, 2011), of which intestinal guanylin (GN) family peptides are promising candidates for the major hormone involved in SW adaptation (Kalujnaia et al., 2009; Takei and Yuge, 2007). We have identified GN, uroguanylin (UGN) and renoguanylin (RGN), and two guanylyl cyclase-C receptors (GC-C1 and GC-C2) in the intestine of Japanese eel (Yuge et al., 2003, 2006). These hormone and receptor genes are expressed abundantly in the different segments of digestive tract, and importantly, their expression is consistently upregulated after transfer of fish from fresh water (FW) to SW. Among the guanylin family, only GN is intestine-specific and secreted from goblet cells into the lumen with mucus (Yuge et al., 2003). Because homologous GN from the eel is available, this euryhaline teleost serves as a good model to analyze the mechanisms of GN action on the  $\text{HCO}_3^-$  secretion. It was shown that GN decreased NaCl absorption through

inhibition of NKCC2b (Ando et al., 2014) and decreased  $\text{Cl}^-$  secretion into the lumen through stimulation of DPC-sensitive anion channels in the intestine of SW-acclimated eels (Ando and Takei, 2015). In the marine toadfish, eel RGN was shown to decrease  $\text{HCO}_3^-$  secretion through inhibition of Slc26a6 in the posterior intestine, while it increased the secretion in the fish acclimated to concentrated (60 ppt) SW (Ruhr et al., 2015). In view of the highly diversified osmoregulatory mechanism and their hormonal regulation in fishes (Takei et al., 2014), it is desirable to examine how homologous GN affects the suite of transporters for  $\text{HCO}_3^-$  secretion in the eel.

In this study, we examined the effect of GN on  $\text{HCO}_3^-$  secretion in the intestine of SW-acclimated eels using pH stat method in the Ussing chamber. As GN increased  $\text{HCO}_3^-$  secretion, we examined the effect of various inhibitors for transporters on the GN-induced  $\text{HCO}_3^-$  secretion to probe the mechanism. To identify target transporters, we then performed RNA-seq analyses and listed all candidate genes expressed in the eel intestine for  $\text{HCO}_3^-$  secretion. Molecular species of the transporters were further narrowed down by quantitative real-time PCR using paralog-specific probes based on the upregulation after transfer of eels from FW to SW. Among upregulated genes, we finally selected candidate transporters involved in GN-induced transcellular  $\text{HCO}_3^-$  secretion based on sensitivity to the inhibitors.

## Materials and Methods

### Animals and drugs

Cultured eels (*Anguilla japonica*) weighing around 200 g were purchased from a pond culture in Yamakine, Chiba, and kept in freshwater aquaria at 18°C for more than 1 week. Some eels were then transferred to seawater (SW) tanks and kept there for more than one week before experimentation (termed SW eels). Fish were not fed after purchase. All experiments performed in this study were approved by the Animal Experiment Committee of The University of Tokyo and performed according to the guidelines prepared by the Committee.

Eel GN (Peptide Institute, Osaka, Japan), bumetanide (Sankyo Co., Tokyo), DNDS and DIDS (Tokyo Chemical Industry Co., Ltd, Tokyo), and DPC (Wako Pure Chemical Industries Ltd., Tokyo) were purchased from commercial sources (see footnote for abbreviations). GN was dissolved in water at  $10^{-4}$  M, aliquoted by 100  $\mu\text{l}$ , kept frozen at -20°C, and diluted by the

appropriate Ringer solutions at the time of experimentation. Bumetanide and DPC were dissolved in ethanol at  $10^{-2}$  M, and final concentration of ethanol was less than 1% after dilution with  $\text{HCO}_3^-$ -free Ringer. One percent ethanol alone had no effects on the electrical parameters of tissues in the Ussing chamber. DNDS and DIDS were dissolved in  $\text{HCO}_3^-$ -free Ringer (for mucosal side addition) or in normal Ringer (for serosal side) at  $10^{-2}$  M, and diluted to  $5 \times 10^{-4}$  M before administration.

### **Physiological studies using Ussing chamber**

After decapitation, the intestine of SW eels ( $n=31$  in total) was removed and stripped of the serosal muscle layers. The stripped intestine was opened and mounted as a flat sheet in an Ussing chamber with an exposed area of  $0.785 \text{ cm}^2$ . The serosal side of the intestine was bathed with Ringer solution (2.3 ml), containing (in mM) 118.5 NaCl, 4.7 KCl, 3.0  $\text{CaCl}_2$ , 1.2  $\text{MgSO}_4$ , 1.2  $\text{KH}_2\text{PO}_4$ , 24.9  $\text{NaHCO}_3$ , 5.0 glucose and 5.0 alanine, and was bubbled with a 95%  $\text{O}_2$  – 5%  $\text{CO}_2$  gas mixture (pH 7.4). Although eel plasma pH is ca. 7.8, all experiments were performed at pH 7.4 because electrical parameters were more stable (Ando et al., 2014) and the effects of GN and bumetanide were more reproducible at this pH (Ando and Takei, 2015). The mucosal side of the intestine was bathed with unbuffered Ringer solution (2.3 ml), where  $\text{NaHCO}_3$  was replaced by NaCl and gassed with 100%  $\text{O}_2$  passed through 20 mM NaOH. The mucosal pH was measured by a pH electrode (MI-410, Microelectrodes. Inc., Bedford, USA) and a pH meter (HM-5B, Toa Electronics, Tokyo, Japan), and clamped at pH 7.4 by pH-stat (HSM-10A, Toa Electronics, Tokyo).

### **$\text{HCO}_3^-$ secretion measurement**

The rate of  $\text{HCO}_3^-$  secretion was estimated by the rate of mucosal alkalization, which was calculated from the amount of 50 mM HCl titrated into the chamber solution to clamp the mucosal pH. The PD was measured at the serosa relative to the mucosa through a pair of electrodes (EK1, WPI, Sarasota, USA) and a voltage/current clamp system (CEZ-9100, Nihon Kohden, Tokyo). To determine the tissue resistance ( $R_t$ ), rectangular pulses (20-30  $\mu\text{A}$ , 500 ms) were applied across the intestinal epithelium every 5 min. These data were recorded automatically on a chart recorder (EPR-121A, Toa Electronics, Ltd., Nagoya, Japan). From the deflection of the PD ( $\Delta\text{PD}$ ), total resistance was calculated and the  $R_t$  was obtained by subtracting fluid resistance ( $120 \text{ ohm. cm}^2$ ) from the total resistance. The short-circuit current ( $I_{sc}$ ) was calculated as  $\Delta\text{PD}/R_t$ .

### **Effects of inhibitors on GN-induced $\text{HCO}_3^-$ secretion**

To assess the ion transporter target(s) of GN that lead to increased  $\text{HCO}_3^-$  secretion, various inhibitors were applied on either mucosal or serosal side of the intestinal epithelia in the Ussing chamber before or after GN administration. The inhibitors applied on the mucosal side were bumetanide, DPC and DNDS/DIDS since, in our earlier studies, GN inhibited NKCC2 and stimulated  $\text{Cl}^-$  channel in the eel (Ando et al., 2014; Ando and Takei, 2015), and since UGN inhibited Pat-1 in the toadfish (Ruhr et al., 2016). DNDS/DIDS was also applied to the serosal side to evaluate the role of basolateral AE and NBC that transport  $\text{HCO}_3^-$  into the cell.

### **Transcriptomic (RNA-seq) analyses**

In order to identify all candidate transporters that are expressed in the eel intestine and could be involved in  $\text{HCO}_3^-$  secretion, we performed RNA-seq analyses using the methods that we reported previously (Wong et al., 2014). For this purpose, eels were transferred directly from FW to SW and the intestine was collected before and 7 d after transfer ( $n=5$  at each time point). After total RNA extraction using Isogen (Takara Bio Inc., Shiga, Japan), the RNA quality was monitored using an Agilent 2100 Bioanalyzer system (Agilent Technology, CA) and only RNA with integrity number  $>7.0$  were used for subsequent procedures and sequencing. The cDNA libraries were prepared from the RNA samples using TruSeq RNA Sample Preparation v2 and sequenced by Illumina HiSeq 2500 (Illumina Inc., CA). The detailed protocol for bioinformatic analysis was described in Wong et al. (2014).

### **Quantitative analyses of gene expression**

In this experiment, the anterior, middle and posterior parts of the intestine were separately collected at 0, 3, 12, 24 h and 3, 7 d after FW-FW and FW-SW transfer ( $n=6$  at each time point). The tissues were immediately frozen, and total RNA was extracted and treated with DNase I (Life Technology, CA) to remove genomic DNA contamination. Then, 1  $\mu\text{g}$  of RNA was reverse-transcribed with Iscript cDNA Synthesis Kit (Bio-Rad, CA) according to the manufacturer's protocols. Real-time PCR was performed using Kappa SYBR 2X PCR mix (Kappa Biosystems, MA) and ABI 7900HT Fast Real Time PCR System (Life Technology). The amplification of a single amplicon was confirmed by analyzing the melting curve after the real time cycling. Eel elongation factor 1 $\alpha$  (*eef1a*) was used as an internal control to normalize the gene expressions among different samples. We also measured the expression of other transporter genes such as *nkcc2b* known to be upregulated in SW eel intestine to confirm the reliability of the assay. Primer sequences are listed in Supplementary Table 1.

### **Statistical analyses**

Statistical analyses of the data were performed using Wilcoxon signed rank test or Mann-Whitney *U*-test, programmed by KyPlot (Ver. 5.0, Kyens Lab Inc. Tokyo, Japan). Results are given as mean  $\pm$  SEM and considered significant at  $P < 0.05$ .

## Results

### Effects of GN on HCO<sub>3</sub><sup>-</sup> secretion

The baseline values before treatments were  $-25.1 \pm 3.2$  mV for potential difference (PD),  $-501.8 \pm 63.1$   $\mu$ A for short-circuit current (Isc), and  $21.9 \pm 1.4$  ohm.cm<sup>2</sup> for transepithelial resistance (Rt) at the middle intestine (n=13). After application of GN to the mucosal side, serosa-negative PD and short-circuit current Isc decreased within 5 min, but HCO<sub>3</sub><sup>-</sup> secretion increased slowly with a latency of ca. 20 min (Fig. 1A). The GN effect on HCO<sub>3</sub><sup>-</sup> secretion was segment-dependent with the greatest effect on the early segment of middle intestine (Fig. 1B). The GN-induced HCO<sub>3</sub><sup>-</sup> secretion was accompanied by a remarkable inhibition of the Isc. However, no correlation was observed between GN-induced HCO<sub>3</sub><sup>-</sup> secretion and Isc (Fig. 2).

### Comparison of GN and bumetanide effects on HCO<sub>3</sub><sup>-</sup> secretion

As GN profoundly inhibited NKCC2 in SW eel intestine (Ando et al., 2014), effects of GN and bumetanide were compared on the HCO<sub>3</sub><sup>-</sup> secretion by the early part of the middle intestine where the GN effect was greatest. When applied to the mucosal side, both GN and bumetanide decreased PD and increased HCO<sub>3</sub><sup>-</sup> secretion to the same degree, and these effects were not additive after consecutive administration (Fig. 3). Pretreatment with bumetanide abolished the GN effect, and vice versa (Fig. 3C), indicating a common target of these drugs.

Similar time courses were observed for GN and bumetanide actions, supporting the common target of these drugs (Table 1). Latent periods for the GN effect on PD were longer than those for bumetanide. However, the time from the PD effect to the HCO<sub>3</sub><sup>-</sup> secretion were similar between GN and bumetanide.

### Effects of inhibitors on GN-induced HCO<sub>3</sub><sup>-</sup> secretion

As the effect of DNDS was more stable and consistent than DIDS in the eel intestine, we report here only the results of DNDS treatment. Mucosal application of DNDS failed to change HCO<sub>3</sub><sup>-</sup> secretion, and subsequent GN application consistently increased it (Fig. 4A). The mucosal DNDS also failed to inhibit the GN-induced HCO<sub>3</sub><sup>-</sup> secretion (Fig. 4B). Another

stilbene inhibitor, DIDS, showed similar effects (data not shown). The inhibition of apical anion channels by DPC did not inhibit the GN action when both were given to the mucosal side (Fig. 4C). However, DNDS applied to the serosal side decreased the GN-induced  $\text{HCO}_3^-$  secretion gradually to a significant level ( $P < 0.001$ ) (Fig. 4D).

### **Changes in candidate gene expression after SW transfer**

#### Transcriptomic analyses

RNA-seq analyses showed that the intestine expressed some genes of Slc4 family and Slc26 family of AE that are potentially transporters of  $\text{HCO}_3^-$  from serosa to mucosa (Supplementary Table 2). Some of them are upregulated after acclimation in SW for 7 d. However, because the known paralogous isoforms (e.g. *pat1a*, *b*, and *c*) reported in eels could not be distinguished in transcriptome analysis, we used real-time PCR to quantify the expression of each isoform to assess their potential involvement in  $\text{HCO}_3^-$  secretion.

#### Real-time PCR analyses

Gene-specific primers for each paralog were designed for qPCR based on the mRNA sequence deduced from the genome database of Japanese eel (Henkel et al., 2012) (Supplementary Table 1). For instance, two alternative transcripts were identified for Slc26a3 (DRA) and *draa* expression was more abundant in the posterior region, while *drab* expression was more abundant in the anterior region (Fig. 5). Moreover, *draa* was upregulated in the posterior intestine, while *drab* was upregulated during the course of SW acclimation in all intestinal regions, particularly in the anterior intestine. Three paralogous *pat1* were expressed in the eel intestine, and *pat1a* and *pat1b* were major transporters as suggested by their expression levels (Fig. 5). The expression of *pat1a* was greatest in the posterior intestine, while *pat1b* was expressed most abundantly in the anterior intestine. Further, the *pat1a* expression increased gradually and reached maximum after 3 d in SW, while the expression decreased for *pat1b* after SW transfer. The expression of *pat1c* increased after 3 d in SW, although the expression level was low (Fig. 5).

Concerning basolateral  $\text{HCO}_3^-$  transporters, the expression of *sat1* was greater posteriorly along the intestine, and its expression level increased 3 d after SW transfer in all segments (Fig. 6). The expression of *slc4a2a* and *b* (*ae2a*, *b*) increased at some time points after SW transfer, but their expression levels were very low in all segments (Fig. 6). The expression of *slc4a1* (*ae1*) was even lower than that of *ae2s*. Three *nbc* genes were expressed in the intestine, of which *nbce1a* was most abundant followed by *nbcn1* and *nbcn2a* (Fig. 7). The expression of *nbce1a*



decreased along the anterior-posterior axis, while those of *ncn1* and *ncn2a* increased posteriorly. The expression of the *ncn* genes increased during the course of SW after acclimation in all intestinal segments (Fig. 7).

## Discussion

The intestine is an important osmoregulatory organ for adaptation to the hyperosmotic SW environment, where water is absorbed from imbibed SW to compensate for osmotic water loss (Grosell, 2011). To achieve efficient water absorption, teleost intestine secretes  $\text{HCO}_3^-$  into the lumen to remove concentrated divalent ions ( $\text{Mg}^{2+}$  and  $\text{Ca}^{2+}$ ) in SW as carbonate precipitates and to decrease luminal fluid osmolality (Grosell et al., 2005; Wilson et al., 2009). Hormones such as growth hormone/IGF-I and cortisol, which re-organize osmoregulatory organs to a SW-type, have long been implicated in SW adaptation (McCormick, 2001; Takei and McCormick, 2013), but investigations of the short-acting, oligopeptide hormones are still new. One of the promising candidates for SW-adapting hormone is the GN family of peptides as they are the only oligopeptide hormones thus far identified that are upregulated at both ligand and receptor levels after transfer of eels to SW (Comrie et al., 2001a, b; Yuge et al., 2003; 2006). Thus, it is quite intriguing to examine how GN regulates  $\text{HCO}_3^-$  secretion through its action on the transport proteins.

### Molecular mechanisms for transcellular $\text{HCO}_3^-$ secretion

The transporters involved in  $\text{HCO}_3^-$  secretion have been pursued in several teleost species. On the apical membrane of intestinal epithelial cells, Pat-1 may play an important role in  $\text{HCO}_3^-$  secretion as its stoichiometry is  $n\text{HCO}_3^-/1\text{Cl}^-$  as shown in the euryhaline pufferfish, *Takifugu obscurus* (Kato et al., 2009), although there are conflicting reports on the stoichiometry of Pat-1 in mammals (see Alper and Sharma, 2013). In fact, *pat1* is profoundly upregulated after transfer of this euryhaline pufferfish from FW to SW (Kurita et al., 2008) and after transfer of toadfish (Ruhr et al., 2016) and sea bream (Gregório et al., 2013) from SW to concentrated SW. Consistently, mucosal DIDS, but not serosal DIDS, inhibited  $\text{HCO}_3^-$  secretion in the sanddab, *Citharichthys sordidus* (Grosell et al., 2001). In eels and other teleosts, however, serosal application of DIDS/DNDS, but not its mucosal application, was effective for the inhibition as confirmed in this study (Dixon and Loretz, 1986; Ando and Subramanyam, 1990; Faggio et al.,

2011). Further,  $\text{HCO}_3^-$  concentration of the serosal fluid greatly influences  $\text{HCO}_3^-$  secretion in these teleosts. The responsible transporter for  $\text{HCO}_3^-$  uptake on the serosal side has been suggested as NBCe1 in a few species of teleost because of upregulation in hyperosmotic environment (Kurita et al., 2008; Taylor et al., 2010; Grosell, 2011; Gregório et al., 2013). Thus, transcellular  $\text{HCO}_3^-$  transport could be conducted by apical Pat-1 and basolateral NBCe1 in some teleost species. The cytosolic  $\text{HCO}_3^-$  may also be provided by hydration of  $\text{CO}_2$  catalyzed by cytosolic carbonic anhydrase (Grosell et al., 2009a; Gregório et al., 2013).

By RNA-seq and subsequent qPCR, we found that three *pat1* paralogs were expressed in the eel intestine and *pat1a* and *pat1c* were upregulated after SW transfer in different parts of the intestine, suggesting their potential roles in  $\text{HCO}_3^-$  secretion. However, the expression of two *dra* paralogs was higher than that of *pat1*, although the reverse is true for the sea bream (Gregório et al., 2013). In particular, the *drab* expression was greatest in the anterior intestine and most profoundly upregulated after SW transfer, which coincides with the observation that white precipitates are observed in the lumen of anterior intestine within a day after transfer of eels to SW. In the posterior intestine, *draa* may take over the role of *drab* for  $\text{HCO}_3^-$  secretion and  $\text{Cl}^-$  absorption as suggested by profound upregulation of the gene at this segment. Thus not only Pat-1, but also DRA is likely involved in the  $\text{HCO}_3^-$  secretion in different segments of SW eel intestine. However, mucosal DNDS/DIDS failed to decrease  $\text{HCO}_3^-$  secretion in this study, which suggests that eel Pat-1 and DRA are not involved in  $\text{HCO}_3^-$  secretion in SW eel intestine, or these AEs of eels are insensitive to these stilbene inhibitors. It is important to note that DNDS/DIDS effectively blocked Pat-1 in mammals (Stewart et al., 2009) and teleosts (Boyle et al., 2015), but DIDS was ineffective to block DRA in the rat (Barmeyer et al., 2007) and mouse (Whittamore and Hatch, 2017). There are no studies on DIDS/DNDS sensitivity to teleost DRA, but it is possible that they are ineffective to block eel DRAs.

We identified three NBC genes in the eel intestine as basolateral transporters, *nbce1a*, *nbcn1* and *nbcn2a*, and they are upregulated after SW transfer. Thus,  $\text{HCO}_3^-$  may be taken up from the serosal fluid by electrogenic NBCe1a and electroneutral NBCn1 and NBCn2a. Interestingly, stoichiometry of the human NBCe1 is  $1\text{Na}^+/2\text{HCO}_3^-$ ; however, external  $\text{Na}^+$  concentration affects the stoichiometry in the NBCe1 of euryhaline pufferfish and the ratio reached  $1\text{Na}^+/4\text{HCO}_3^-$  at 120 mM  $\text{Na}^+$  (Chang et al., 2012). Another candidate for  $\text{HCO}_3^-$  uptake is Sat-1 whose gene was upregulated after SW transfer in the eel intestine. We also identified AE1 and AE2 that are usually located on the basolateral membrane of transport epithelia (Romero et al., 2013), but

their expression levels were very low in the SW eel intestine.

### **Mechanisms of the GN action on $\text{HCO}_3^-$ secretion**

The rate of  $\text{HCO}_3^-$  secretion in the SW eel intestine observed in this study seems to be higher than those of other marine fishes thus far reported (Table 2). This may be due to lower pH (7.4) used in the present study, as a linear relationship was reported between  $\text{HCO}_3^-$  secretion rate and pH in the flounder intestine (Wilson and Grosell, 2003). Another possibility is higher concentration of serosal  $\text{HCO}_3^-$  (24.9 mM) used in this study compared with other studies, since  $\text{HCO}_3^-$  secretion across the toadfish anterior intestine is dependent on the serosal  $\text{HCO}_3^-$  concentration (Taylor et al., 2010).

#### Effects on the apical transporters

The present study showed that GN activates  $\text{HCO}_3^-$  secretion after a latent period of about 20 min. The slow enhancement indicates that GN may not act directly on the  $\text{HCO}_3^-$  transporters on the apical membrane of epithelial cells but through its action on NKCC2 inhibition (Ando et al., 2014). Consistently, the effects of GN and bumetanide were similar in both magnitude and time course, and they were not additive. It seems that the NKCC2 inhibition decreases intracellular  $\text{Cl}^-$  concentration, which then activates DRA/Pat-1 on the apical membrane to take up  $\text{Cl}^-$  in exchange of  $\text{HCO}_3^-$ . The upregulation of two *dra* and three *pat1* supports this hypothesis. If eel Pat-1s are electrogenic as discussed above, the serosa-negative PD should decrease after GN action. However, there was no correlation between changes in  $\text{HCO}_3^-$  secretion and PD after GN, suggesting that the induced  $\text{HCO}_3^-$  secretion is electroneutral. As DRA is electroneutral in mammals (see Alper and Sharma, 2013), it is possible that electroneutral and DNDS-insensitive DRAs are involved in GN-induced  $\text{HCO}_3^-$  secretion in the eel (Fig. 8).

As a second candidate for the route of  $\text{HCO}_3^-$  secretion, we considered  $\text{Cl}^-$  channels such as CFTR, since GN stimulates apical  $\text{Cl}^-$  channel in the SW eel intestine (Ando and Takei, 2015) and  $\text{HCO}_3^-$  is known to pass through the  $\text{Cl}^-$  channels (Rubenstein, 2018). Two CFTR genes exist in the eel, but the expression of the *cftrs* was low and decreased after SW transfer in the eel intestine (Ando et al. 2014; Wong et al., 2016). Considerable expression of *cftr* was reported in some teleost species (Marshall and Singer, 2002; Gregório et al., 2013), and it was recently reported that eel RGN induced CFTR insertion into the apical membrane of toadfish enterocytes (Ruhr et al., 2018). However, mucosal DPC, which effectively abolished GN-induced  $\text{Cl}^-$  secretion in the eel intestine (Ando and Takei, 2015), failed to inhibit GN-induced  $\text{HCO}_3^-$  secretion in the present study. Thus, it is unlikely that GN directly stimulates  $\text{Cl}^-$  channel

including CFTR for  $\text{HCO}_3^-$  secretion in the SW eel intestine. The slow electroneutral effect of GN on  $\text{HCO}_3^-$  secretion also excludes the direct involvement of  $\text{Cl}^-$  channel in the GN effect. The remaining possibility is that GN further decreased cytosolic  $\text{Cl}^-$  through  $\text{Cl}^-$  channel, and the decreased cytosolic  $\text{Cl}^-$  activates DNDS-insensitive DRA (Fig. 8). This route may be active in SW eel intestine *in vivo*, where  $\text{Cl}^-$  concentration is very low and the function of DPC-sensitive  $\text{Cl}^-$  channel is evident (Ando and Takei, 2015).

In the intestine of mammals, GN enhances  $\text{HCO}_3^-$  secretion through its action on CFTR, but the effect is much faster than that observed in the eel intestine (Guba et al., 1996; Sellers et al., 2008). The GN effect was diminished in CFTR-deficient mice or after blocking the apical  $\text{Cl}^-$  channels by inhibitors (Seidler et al, 1997; Zuang et al., 2007). The plausible model for GN action is that cGMP produced after binding to GC-C inhibits phosphodiesterase, resulting in cAMP accumulation and activation of CFTR for  $\text{HCO}_3^-$  secretion (Sindic and Schlatter, 2006). However, as GN enhances intestinal  $\text{HCO}_3^-$  secretion in the CFTR-deficient mice (Sellers et al., 2008), GN also acts on the  $\text{HCO}_3^-$  transport system other than CFTR (Ko et al., 2002).

#### Effects on the basolateral transporters

In contrast to the mucosal application, serosal DNDS inhibited GN-stimulated  $\text{HCO}_3^-$  secretion. This indicates that  $\text{HCO}_3^-$  uptake across the basolateral membrane is a limiting step for the transcellular  $\text{HCO}_3^-$  flux from serosa to mucosa. Of the  $\text{HCO}_3^-$  secreted into the lumen, 80% was suggested to be taken up from the serosal fluid and the rest was produced within the cell from  $\text{CO}_2$  by carbonic anhydrase in the enterocyte of sea bass (Faggio et al., 2011). NBCe1 has been suggested to be responsible for  $\text{HCO}_3^-$  uptake in the pufferfish (Kurita et al., 2008), toadfish (Taylor et al., 2010) and sea bream (Gregório et al., 2013). Six possible  $\text{HCO}_3^-$  transporters, NBCe1a, NBCn1 and NBCn1a, Sat-1, AE1 and AE2, appear to exist on the basolateral membrane of eel enterocytes and three *nbc* genes and *sat1* were upregulated after SW transfer. Thus it is possible that GN stimulates these basolateral transporters (Fig. 8). The uptake of  $\text{HCO}_3^-$  across the basolateral membrane may explain the slow process of GN-induced  $\text{HCO}_3^-$  secretion. However, it is also likely that the decrease in intracellular  $\text{Na}^+$  after NKCC2 inhibition stimulates  $\text{Na}^+$  and  $\text{HCO}_3^-$  cotransport by the NBCs, which then promote apical DRA for  $\text{HCO}_3^-$  secretion (Fig. 8). The intestinal  $\text{HCO}_3^-$  secretion is inhibited by prolactin in the seabream, which was mediated through the downregulation of *nbce1* (Ferlazzo et al., 2012), supporting the rate-limiting role of basolateral NBCe1 in  $\text{HCO}_3^-$  secretion in this species.

In the toadfish intestine, RGN contrarily inhibited  $\text{HCO}_3^-$  secretion, but it increased the

secretion slightly in fish acclimated in concentrated SW (Ruhr et al., 2015). The weak effect of RGN may be due to the low  $\text{HCO}_3^-$  concentration of serosal fluid in their study and greater dependence on the cytosolic  $\text{HCO}_3^-$  produced by carbonic anhydrase in this species (Taylor et al., 2010). In the eel, GN-induced  $\text{HCO}_3^-$  secretion depends deeply on the  $\text{HCO}_3^-$  uptake from the serosal fluid. Judging from the greater dependence of RGN effect on Pat-1 and CFTR in the toadfish, the molecular mechanisms for  $\text{HCO}_3^-$  secretion in the intestine and its regulation by hormones are highly diverse among teleost species as observed in other osmoregulatory organs (Takei et al., 2014). Concerning other hormones, stanniocalcin stimulated  $\text{HCO}_3^-$  secretion in the sea bream intestine and parathyroid hormone-related peptide inhibited it (Fuentes et al., 2010, Table 2).

### **Acknowledgements**

The authors thank Drs. Haruka Ozaki, Wataru Iwasaki and Yuzuru Suzuki of the University of Tokyo for transcriptomic analysis, and Dr. Christopher A. Loretz of State University of New York at Buffalo for his valuable comments on the manuscript and polishing English. This work was supported by Grant-in-Aid for Scientific Research (A) from the Japan Society for the Promotion of Science (23247010) and by Grant-in-Aid for Scientific Research on Innovation Areas “Genome Science” from Ministry of Education, Culture, Sports, Science and Technology of Japan (221S0002) to Y.T.

## References

- Alper, S. L. and Sharma, A. K.** (2013). The SLC26 gene family of anion transporters and channels. *Mol. Aspects Med.* **34**, 494-515.
- Ando, M., and Subramanyam, M. V. V.** (1990). Bicarbonate transport systems in the intestine of the seawater eel. *J. Exp. Biol.* **150**, 381-394.
- Ando, M. and Takei, Y.** (2015). Guanylin activates Cl<sup>-</sup> secretion into the lumen of seawater eel intestine via apical Cl<sup>-</sup> channel under simulated in vivo condition. *Am. J. Physiol.* **308**, R400-R410.
- Ando, M., Wong, M. K. S. and Takei, Y.** (2014). Mechanisms of guanylin action on water and ion absorption at different regions of seawater eel intestine. *Am. J. Physiol.* **307**, R653-R663.
- Barmeyer, C., Ye, J. H., Sidani, S., Geibel, J., Binder, H. J. and Rajendran V. M.** (2007). Characteristics of rat downregulated in adenoma (rDRA) expressed in HEK 293 cells. *Pflü. Arch.* **454**, 441-450.
- Boyle, D., Clifford, A. M., Orr, E., Chamot, D. And Goss, G. G.** (2015). Mechanisms of Cl<sup>-</sup> uptake in rainbow trout: Cloning and expression of *slc26a6*, a prospective Cl<sup>-</sup>/HCO<sub>3</sub><sup>-</sup> exchanger. *Comp. Biochem. Physiol. A* **180**, 43-50.
- Chang, M, Plata, C., Kurita, Y., Kato, A., Hirose, S. And Romero, M. F.** (2012). Euruhaline pufferfish NBCe1 differs from nonmarine species NBCe1 physiology. *Am. J. Physiol.* **302**, C1083-C1095.
- Comrie, M. M., Cutler, C. P. and Cramb, G.** (2001a). Cloning and expression of guanylin from the European eel (*Anguilla anguilla*). *Biochem. Biophys. Res. Comm.* **281**, 1078-1085.
- Comrie, M. M., Cutler, C. P. and Cramb, G.** (2001b). Cloning and expression of two isoforms of guanylate cyclase c (GC-C) from the European eel (*Anguilla anguilla*). *Comp. Physiol. Biochem.* **129B**, 575-586.
- Cutler, C. P. and Cramb, G.** (2008). Differential expression of absorptive cation-chloride-cotransporters in the intestinal and renal tissues of the European eel (*Anguilla anguilla*). *Comp. Biochem. Physiol. B* **149**, 63-73.
- Dixon, J. and Loretz, C.** (1986). Luminal alkalinization in the intestine of the goby. *J. Comp. Physiol. B* **156**, 803-811.
- Faggio, C., Tirre, A., Lando, G., Sabatino, G. and Trischitta, F.** (2011). Carbonate precipitates

- and bicarbonate secretion in the intestine of sea bass, *Dicentrarchus labrax*. *J. Comp. Physiol. B* **181**, 517-525.
- Ferlazzo, A., Carvalho, E. S. M., Gregorio, S. F., Power, D. M., Canario, A. V. M., Trischitta, F. and Fuentes, J.** (2012). Prolactin regulates luminal bicarbonate secretion in the intestine of the sea bream (*Sparus aurata* L.). *J. Exp. Biol.* **215**, 3862-3844.
- Fuentes, J., Power, D. M. and Canario, A. V. M.** (2010). Parathyroid hormone-related protein-stanniocalcin antagonism in regulation of bicarbonate secretion and calcium precipitation in a marine fish intestine. *Am. J. Physiol.* **299**, R150-R158.
- Esbaugh, A. J. and Cutler, B.** Intestinal Na<sup>+</sup>, K<sup>+</sup>, 2Cl<sup>-</sup> cotransporter 2 plays a crucial role in hyperosmotic transitions of a euryhaline teleost. *Physiol. Rep.* **4**, e13028.
- Genz, J. and Grosell, M.** (2011). *Fundulus heteroclitus* acutely transferred from seawater to high salinity require few adjustments to intestinal transport associated with osmoregulation. *Comp. Biochem. Physiol. A* **160**, 156-165.
- Gregório, S. F., Carvalho, E. S. M., Encarnação, S., Wilson, J. M., Power, D. M., Canário, A. V. M. and Fuentes, J.** (2013). Adaptation to different salinities exposes functional specialization in the intestine of the sea bream (*Sparus aurata* L.). *J. Exp. Biol.* **216**, 470-479.
- Grosell, M.** (2006). Intestinal anion exchange in marine fish osmoregulation. *J. Exp. Biol.* **209**, 2813-2827.
- Grosell, M.** (2011). Intestinal anion exchange in marine teleosts is involved in osmoregulation and contributes to the oceanic inorganic carbon cycle. *Acta Physiol.* **202**, 421-434.
- Grosell, M. and Genz, J.** (2006). Ouabain-sensitive bicarbonate secretion and acid absorption by the marine teleost fish intestine. *Am. J. Physiol.* **291**, R1145-1156.
- Grosell, M. and Jensen, F. B.** (1999). NO<sub>2</sub><sup>-</sup> uptake and HCO<sub>3</sub><sup>-</sup> secretion in the intestine of the European flounder (*Platichthys flesus*). *J. Exp. Biol.* **202**, 2103-2110.
- Grosell, M., Laliberte, C. N., Wood, S., Jensen, F. B. and Wood, C. M.** (2001). Intestinal HCO<sub>3</sub><sup>-</sup> secretion in marine teleost fish: evidence for an apical rather than basolateral Cl<sup>-</sup>/HCO<sub>3</sub><sup>-</sup> exchanger. *Fish Physiol. Biochem.* **24**, 81-95.
- Grosell, M., Genz, J., Taylor, J. R., Perry, S. F., and Gilmour, K. M.** (2009a). The involvement of H<sup>+</sup>-ATPase and carbonic anhydrase in intestinal HCO<sub>3</sub><sup>-</sup> secretion in seawater-acclimated rainbow trout. *J. Exp. Biol.* **212**, 1940-1948.
- Grosell, M., Mager, E. M., Williams, C. and Taylor, J. R.** (2009b). High rates of HCO<sub>3</sub><sup>-</sup>

secretion and Cl<sup>-</sup> absorption against adverse gradients in the marine teleost intestine: the involvement of an electrogenic anion exchanger and H<sup>+</sup>-pump metabolism? *J. Exp. Biol.* **212**, 1684-1696.

- Grosell, M., Wood, C. M., Wilson, R. W., Burry, N. R., Hogstrand, C., Rankin, C. and Jensen, F. B.** (2005). Bicarbonate secretion plays a role in chloride and water absorption of the European flounder intestine. *Am. J. Physiol.* **288**, R936-R946.
- Guba, M., Kuhn, M., Forssmann, W.-G., Classen, M., Greger, M. and Seidler, U.** (1996). Guanylin strongly stimulates rat duodenum HCO<sub>3</sub><sup>-</sup> secretion: proposed mechanism and comparison with other secretagogues. *Gastroenterology* **111**, 1558-1568.
- Henkel, C. V., Dirks, R. P., de Wijze, D. L. et al.** (2012). First draft genome sequence of the Japanese eel, *Anguilla japonica*. *Gene* **511**, 195–201.
- Hirano, T. and Mayer-Gostan, N.** (1976). Eel esophagus as an osmoregulatory organ. *Proc. Natl. Acad. Sci. USA* **73**, 1348-1350.
- Kalujnaia, S., Wilson, G. D., Feilen, A. L. and Cramb, G.** (2009). Guanylin-like peptides, guanylate cyclase and osmoregulation in the European eel (*Anguilla anguilla*). *Gen. Comp. Endocrinol.* **161**, 103-114.
- Kato, A., Chang, M. H., Kurita, Y., Nakada, T., Ogoshi, M., Nakazato, T., Doi, H., Hirose, S. and Romero, M. F.** (2009). Identification of renal transporters involved in sulfate excretion in marine teleost fish. *Am. J. Physiol.* **297**, R1647-R1659.
- Ko, S. B. H., Shcheynikov, N., Choi, J. Y. et al.** (2002). A molecular mechanism for aberrant CFTR-dependent HCO<sub>3</sub><sup>-</sup> transport in cystic fibrosis. *EMBO J.* **21**, 5662-5772.
- Kurita, Y., Nakada, T., Kato, A., Doi, H., Mistry, A. C., Chang, M.-H., Romero, M. F. and Hirose, S.** (2008). Identification of intestinal bicarbonate transporters involved in formation of carbonate precipitates to stimulate water absorption in marine teleost fish. *Am. J. Physiol.* **294**, R1402-R1412.
- Marshall, W. S. and Singer, T. D.** (2002). Cystic fibrosis transmembrane conductance regulator in teleost fish. *Biochim. Biophys. Acta* **1566**, 16-27.
- McCormick, S. D.** (2001). Endocrine control of osmoregulation in teleost fish. *Am. Zool.* **41**, 781-794.
- Parmelee, J. T. and Renfro, J. L.** (1983). Esophageal desalination of seawater in flounder: role of active sodium transport. *Am. J. Physiol.* **245**, R888-R893.



- Romero, M. F., Chen, A.-P., Parker, M. D. and Boron, W. F.** (2013). The SLC4 family of bicarbonate ( $\text{HCO}_3^-$ ) transporters. *Mol. Aspects Med.* **34**, 159-182.
- Rubenstein, R. C.** (2018). Editorial Focus: CFTR-dependent bicarbonate secretion by Calu-3 cells. *Physiol. Rep.* **6**, e13691.
- Ruhr, I. M., Mager, E. M., Takei, Y. and Grosell, M.** (2015). The differential role of renoguanylin in osmoregulation and apical  $\text{Cl}^-/\text{HCO}_3^-$  exchange activity in the posterior intestine of the Gulf toadfish (*Opsanus beta*) acclimated to hypersalinity. *Am. J. Physiol.* **309**, R399-R409.
- Ruhr, I. M., Takei, Y. and Grosell, M.** (2016). The role of the rectum in osmoregulation and the potential effect of renoguanylin on SLC26a6 transport activity in the gulf toadfish (*Opsanus beta*). *Am. J. Physiol.* **311**, R179-R191.
- Ruhr, I. M., Schauer, K. L., Takei, Y. and Grosell, M.** (2018). Renoguanylin stimulates apical CFTR translocation and decreases  $\text{HCO}_3^-$  secretion through PKA activity in the gulf toadfish (*Opsanus beta*). *J. Exp. Biol.* **221**, jeb173948.
- Seidler, U., Blumenstein, I., Kretz, A. et al.** (1997). A functional CFTR protein is required for mouse intestinal cAMP-, cGMP- and  $\text{Ca}^{2+}$ -dependent  $\text{HCO}_3^-$  secretion. *J. Physiol.* **505**, 411-423.
- Sellers, Z. M., Mann, E., Smith, A. et al.** (2008). Heat-stable enterotoxin of *Escherichia coli* (STa) can stimulate duodenal  $\text{HCO}_3^-$  secretion via a novel GC-C- and CFTR-independent pathway. *FASEB J.* **22**, 1306-1316.
- Sindic, A. and Schlatter, E.** (2006). Cellular effects of guanylin and uroguanylin. *J. Am. Soc. Nephrol.* **17**, 607-616.
- Stewart, A. K., Yamamoto, A., Nakakuki, M., Kondo, T., Alper, S. I. and Ishiguro, H.** (2009). Functional coupling of apical  $\text{Cl}^-/\text{HCO}_3^-$  exchange with CFTR in stimulated  $\text{HCO}_3^-$  secretion by guinea pig interlobular pancreatic duct. *Am. J. Physiol.* **296**, G1307-G1317.
- Takei, Y. and Loretz, C. A.** (2011). The gastrointestinal tract as an endocrine/neuroendocrine/paracrine organ: Organization, chemical messengers and physiological targets. Endocrinology. In: *The Multifunctional Gut of Fish*, edited by Grosell M, Farrell AP, Brauner CJ. San Diego, CA: Academic, pp. 262-319.
- Takei, Y. and McCormick, S. D.** (2013). Hormonal control of fish euryhalinity. In: *Fish Physiology Vol. 32: Euryhaline Fishes* (S. D. McCormick, A. P. Farrell, and C. J. Brauner eds.),

- Academic Press, San Diego, pp. 69-123.
- Takei, Y. and Yuge, S.** (2007). The intestinal guanylin system and seawater adaptation in eels. *Gen. Comp. Endocrinol.* **152**, 339-351.
- Takei, Y., Hiroi, J., Takahashi, T. and Sakamoto, T.** (2014). Diverse mechanisms of body fluid regulation in teleost fishes. *Am. J. Physiol.* **307**, R778-R792
- Takei, Y., Wong, M. K. S., Pipil, S., Ozaki, H., Iwasaki, W., Suzuki, Y. and Kusakabe, M.** (2017). Molecular mechanisms underlying active desalination in the esophagus of seawater eels. *Am. J. Physiol.* **312**, R231-R244.
- Taylor, J. R., Mager, E. M. and Grosell, M.** (2010). Basolateral NBCe1 plays a rate-limiting role in transepithelial intestinal HCO<sub>3</sub><sup>-</sup> secretion, contributing to marine fish osmoregulation. *J. Exp. Biol.* **213**, 459-468.
- Whittamore, J. M. and Hatch, M.** (2017). Loss of the anion exchanger DRA (Slc26a3), or PAT1 (Slc26a6), alters sulfate transport by the distal ileum and overall sulfate homeostasis. *Am. J. Physiol.* **313**, G166-G179.
- Wilson, R. W. and Grosell, M.** (2003). Intestinal bicarbonate secretion in marine teleost fish – source of bicarbonate, pH sensitivity, and consequences for whole animal acid-base and calcium homeostasis. *Biochim. Biophys. Acta* **1618**, 163-174.
- Wilson, R., Millero, F., Taylor, J., Walsh, P., Christensen, V., Jennings, S. and Grosell, M.** (2009). Contribution of fish to the marine inorganic carbon cycle. *Science* **323**, 359-362.
- Wong, M. K. S., Ozaki, H., Suzuki, Y., Iwasaki, W., and Takei, Y.** (2014). Discovery of osmotic sensitive transcription factors in fish intestine via a transcriptomic approach. *BMC Genomics* **15**: 1134.
- Wong, M. K. S., Pipil, S., Kato, A. and Takei, Y.** (2016). Duplicated CFTR isoforms in eels diverged in regulatory structures and osmoregulatory functions. *Comp. Biochem. Physiol. A* **199**, 130-141.
- Yuge, S., Inoue, K., Hyodo, S. and Takei, Y.** (2003). A novel guanylin family (guanylin, uroguanylin, and renoguanylin) in eels. *J. Biol. Chem.* **278**, 22726-22733.
- Yuge, S., Yamagami, S., Inoue, K., Suzuki, N. and Takei, Y.** (2006). Identification of two functional guanylin receptors in eels: multiple hormone-receptor system for osmoregulation in fish intestine and kidney. *Gen. Comp. Endocrinol.* **149**, 10-20.
- Zuang, H., Ameen, N., Melvin, J. E. and Vidyasagar, S.** (2007). Acute inflammation alters

bicarbonate transport in mouse ileum. *J. Physiol.* **581**, 1221-1233.

## Figure legends

**Fig. 1.** (A) An example of the effects of mucosal guanylin (GN) on the transepithelial potential difference (PD), tissue resistance (Rt), short-circuit current (Isc), and  $\text{HCO}_3^-$  secretion rate ( $\text{J}_{\text{HCO}_3^-}$ ) in the middle intestine of SW eels. Recovery from GN treatment was observed after rinsing. (B) Regional differences in the effects of GN ( $5 \times 10^{-7}$  M) on Isc, Rt, and  $\text{J}_{\text{HCO}_3^-}$  in SW eel intestine. Middle and posterior segments, where GN effects were prominent, were divided as M1-3 and P as described previously (Ando et al., 2014). White and black columns show before and after treatment, respectively. Values are means  $\pm$  SEM. Numbers of experiments are in parenthesis. \*  $p < 0.05$ , \*\*  $p < 0.01$  compared with the value before treatment.

**Fig. 2.** Correlation between guanylin (GN)-induced  $\text{HCO}_3^-$  secretion and short-circuit current (Isc) inhibition. Data are obtained from the first (open circle), second (closed circle), third (open square) segments of middle intestine, and from the posterior intestine (closed square). Regression line and its equation are shown on the panel.

**Fig. 3.** (A) An example of the effects of successive application of guanylin (GN) and bumetanide to the mucosal fluid on the transepithelial potential difference (PD), tissue resistance (Rt), short-circuit current (Isc), and  $\text{HCO}_3^-$  secretion rate ( $\text{J}_{\text{HCO}_3^-}$ ) in the middle intestine of SW eels. (B) An example of the effects of successive application of bumetanide and GN to the mucosal side on the electric parameters. (C) Summary of the successive application of GN and bumetanide, or vice versa, on  $\text{HCO}_3^-$  secretion. Values are means  $\pm$  SEM (n=9). \*\*  $p < 0.01$  compared with the value before treatment.

**Fig. 4.** Effects of transporter inhibitors on the GN-induced  $\text{HCO}_3^-$  secretion in the middle intestine of SW eels. DNDS was applied to the mucosal side before (A) or after GN (B). (C) DPC was applied to the mucosal side after GN. (D) DNDS was applied to the serosal side after GN. Values are means  $\pm$  SEM. Numbers of experiments are in parenthesis. \*  $p < 0.05$ , \*\*\*  $p < 0.001$  compared with controls. For abbreviation of inhibitors, see footnotes.

**Fig. 5.** Time-course changes in gene expression of the Slc26 family of anion exchangers in different segments of eel intestine after transfer of eels from fresh water to seawater (black column) or to fresh water (controls, white column). These transporters are located on the apical membrane of epithelial cells and likely to be involved in  $\text{HCO}_3^-$  secretion. Values are means  $\pm$  SEM. \*  $p < 0.05$ , \*\*  $p < 0.01$ , \*\*\*  $p < 0.001$  compared with fresh water controls. For abbreviations, see

footnotes.

**Fig. 6.** Time-course changes in gene expression of anion exchangers in different segments of eel intestine after transfer of eels from fresh water to seawater (black column) or to fresh water (controls, white column). These transporters appear to be located on the basolateral membrane and involved in  $\text{HCO}_3^-$  uptake. Values are means  $\pm$  SEM. \*  $p < 0.05$ , \*\*  $p < 0.01$ , \*\*\*  $p < 0.001$  compared with fresh water controls. For abbreviations, see footnotes.

**Fig. 7.** Time-course changes in gene expression of  $\text{Na}^+$ - $\text{HCO}_3^-$  cotransporters in different segments of eel intestine after transfer of eels from fresh water to seawater (black column) or to fresh water (controls, white column). These transporters are located on the basolateral membrane and likely to be involved in  $\text{HCO}_3^-$  uptake. Values are means  $\pm$  SEM. \*  $p < 0.05$ , \*\*  $p < 0.01$ , \*\*\*  $p < 0.001$  compared with controls. For abbreviations, see footnotes.

**Fig. 8.** A possible mechanism of GN action on transepithelial  $\text{HCO}_3^-$  secretion in the SW eel intestine. Thick lines from phosphokinase G II (PKGII) show established actions of GN on NKCC2 (inhibition) and on  $\text{Cl}^-$  channel (stimulation), and thin lines show deduced action on basolateral transporters (stimulation). The effect of inhibitors were effective (solid line) or ineffective (dotted line). It is possible that stimulation of  $\text{Cl}^-$  channel is mediated by cAMP (see text). The GN actions on NKCC2 and  $\text{Cl}^-$  channel decrease cytosolic  $\text{Cl}^-$  and  $\text{Na}^+$ , which may stimulate apical DRA and Pat-1 and basolateral NBCs indirectly. For details, see text.

Abbreviations are in footnotes.

**Table 1.** Time-course effects of guanylin (GN) and bumetanide on electrophysiological and transport parameters.

| Time (min)                                                    | GN (n=10)  | Bumetanide (n=7) |
|---------------------------------------------------------------|------------|------------------|
| Effect on potential difference (PD)                           |            |                  |
| Latent period                                                 | 3.6 ± 0.6  | 1.6 ± 0.2**      |
| Time to maximum                                               | 27.8 ± 3.6 | 22.6 ± 1.3       |
| Time constant*                                                | 9.6 ± 1.0  | 8.0 ± 1.5        |
| Effect on HCO <sub>3</sub> <sup>-</sup> secretion             |            |                  |
| Latent period                                                 | 22.1 ± 1.7 | 19.4 ± 1.1       |
| Interval between PD and HCO <sub>3</sub> <sup>-</sup> effects | 18.6 ± 1.7 | 17.8 ± 1.2       |

Mean ± SEM

\*Time to 50% maximum, \*\*P<0.01 (Mann-Whitney *U*-test)

**Table 2.** Rates of  $\text{HCO}_3^-$  secretion in various segments of the intestine isolated from marine teleosts

| Animals                                                  | $\text{HCO}_3^-$ secretion ( $\mu\text{mole}/\text{cm}^2 \cdot \text{h}$ ) |        |           | pH      | $[\text{HCO}_3^-]_s$<br>(mM) | References              |
|----------------------------------------------------------|----------------------------------------------------------------------------|--------|-----------|---------|------------------------------|-------------------------|
|                                                          | Anterior                                                                   | Middle | Posterior |         |                              |                         |
| <b>Japanese eel</b> ( <i>Anguilla japonica</i> )         | 1.1                                                                        | 1.4    | 1.1       | 7.4     | 24.9                         | Present study           |
| + GN ( $5 \times 10^{-7}$ M)                             | 1.0                                                                        | 2.3    | 1.2       |         |                              |                         |
| <b>Goby</b> ( <i>Gillichthys mirabilis</i> )             |                                                                            |        | 0.7       | 7.6     | 5                            | Dixon & Loretz (1986)   |
| <b>Pacific sanddab</b> ( <i>Citharichthys sordidus</i> ) | 0.8                                                                        | 0.9    | 0.9       | 7.8–7.9 | 11.9                         | Grosell et al. (2001)   |
| <b>Killifish</b> ( <i>Fundulus heteroclitus</i> )        | 0.6                                                                        |        |           | 7.8     | 11.9                         | Genz & Grosell (2011)   |
| <b>European flounder</b> ( <i>Platichthys flesus</i> )   | 0.4                                                                        | 0.3    | 0.2       | 7.8     | 10                           | Grosell & Jensen (1999) |
| Control                                                  | 0.4                                                                        |        |           | 7.8     | 11.9                         | Wilson & Grosell (2003) |
| pH 7.4                                                   | 1.7                                                                        |        |           | 7.4     | 11.9                         |                         |
| Basal                                                    | 0.27                                                                       | 0.33   | 0.44      | 7.9     | 11                           |                         |
| <b>Rainbow trout</b> ( <i>Oncorhynchus mykiss</i> )      | 0.42                                                                       |        |           | 7.8     | 5                            | Grosell et al. (2009a)  |
| <b>Sea bream</b> ( <i>Sparus aurata</i> )                | 0.45                                                                       |        |           | 7.8     | 10                           | Fuentes et al. (2010)   |
| + PTHrP (1–34)                                           | 0.15                                                                       |        |           |         |                              |                         |
| + sbSTC 1                                                | 1.1                                                                        |        |           |         |                              |                         |
| Control                                                  | 0.55                                                                       |        |           | 7.8     | 3                            |                         |
| + Prolactin                                              | 0.20                                                                       |        |           |         |                              |                         |
| <b>Sea bass</b> ( <i>Dicentrarchus labrax</i> )          |                                                                            | 0.9    |           | 7.7     | 10                           | Faggio et al. (2011)    |
| <b>Toadfish</b> ( <i>Opsanus beta</i> )                  | 0.2                                                                        | 0.2    | 0.22      | 7.8     | 5                            | Grosell (2006)          |
| Basal                                                    | 0.45                                                                       |        |           | 7.8     | 5                            | Grosell & Genz (2006)   |
| Basal ( $20 \text{ mM HCO}_3^-$ )                        | 1.19                                                                       |        |           | 7.8     | 20                           | Taylor et al. (2010)    |
| Control                                                  |                                                                            |        | 0.35      | 7.8     | 5                            | Ruhr et al. (2015)      |
| + RGN ( $10^{-7}$ M)                                     |                                                                            |        | 0.30      |         |                              |                         |

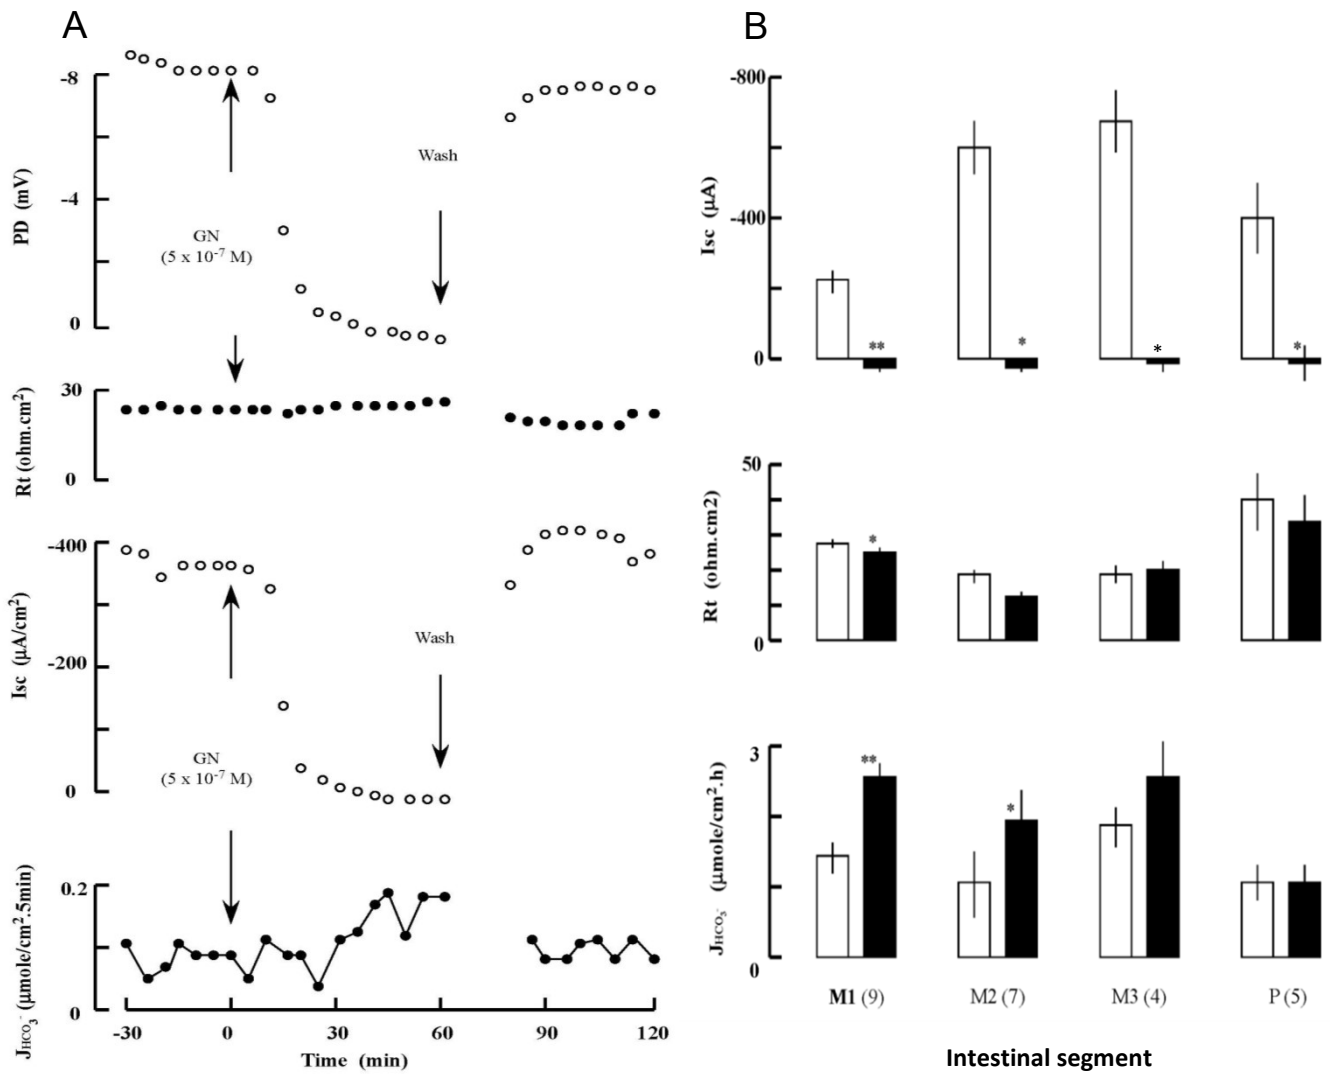

Fig. 1 Takei et al.



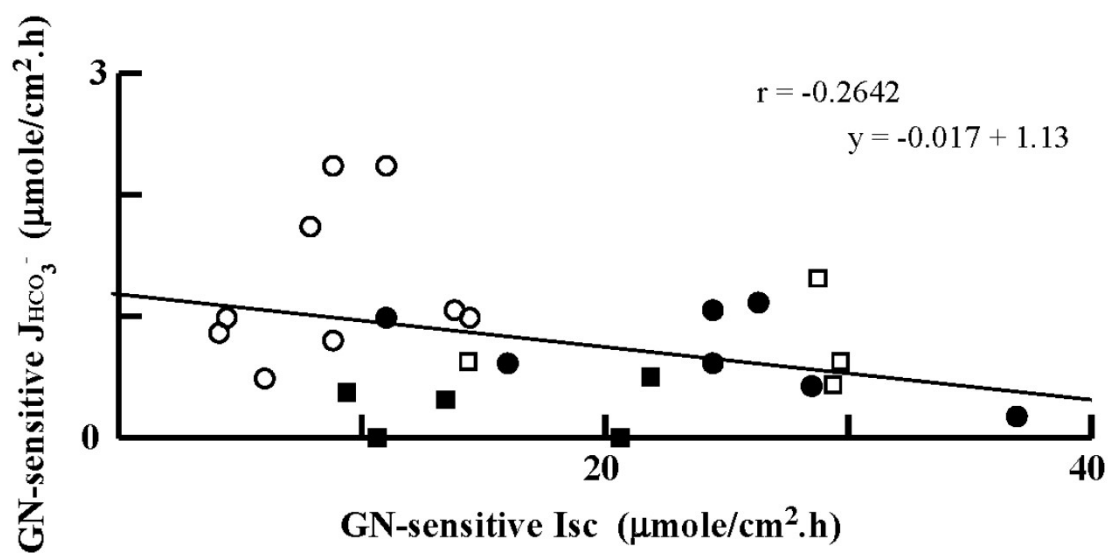

Fig. 2 Takei et al.

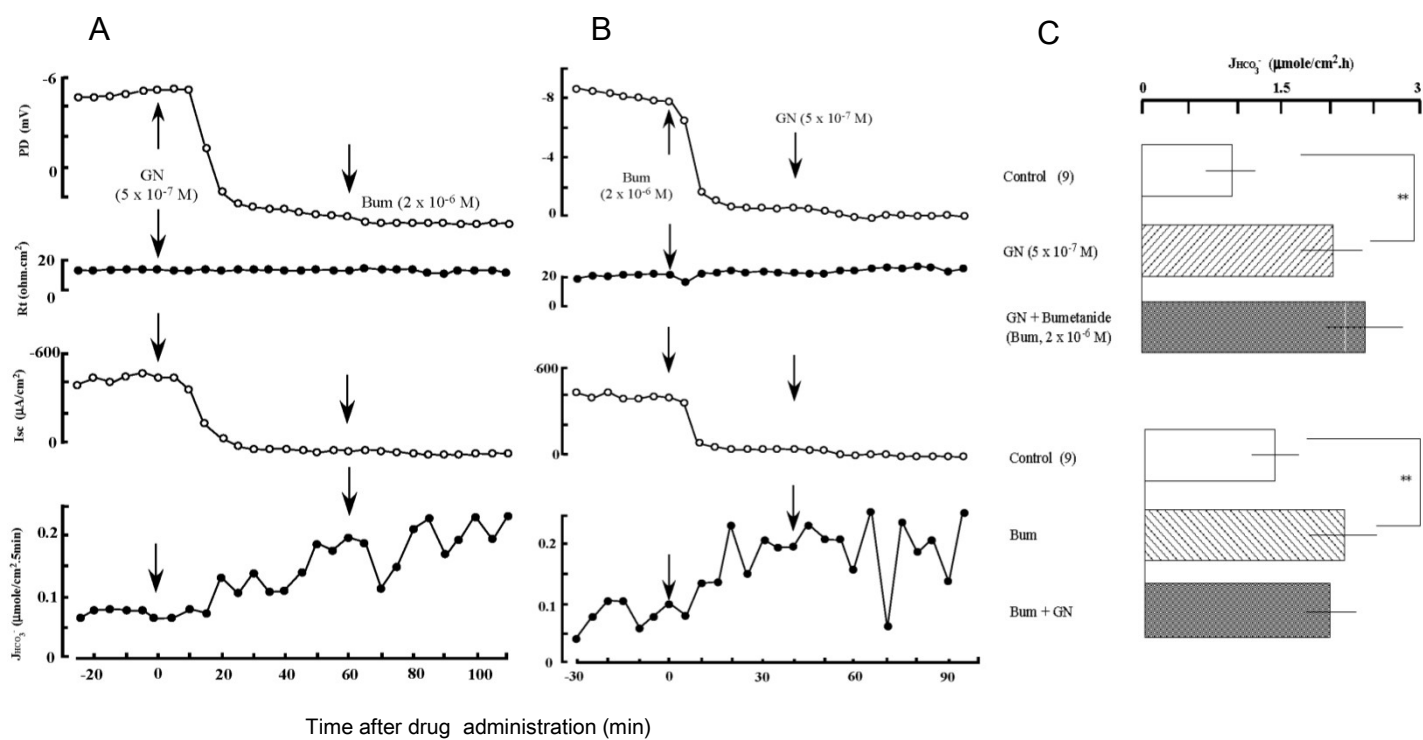

Fig. 3 Takei et al.

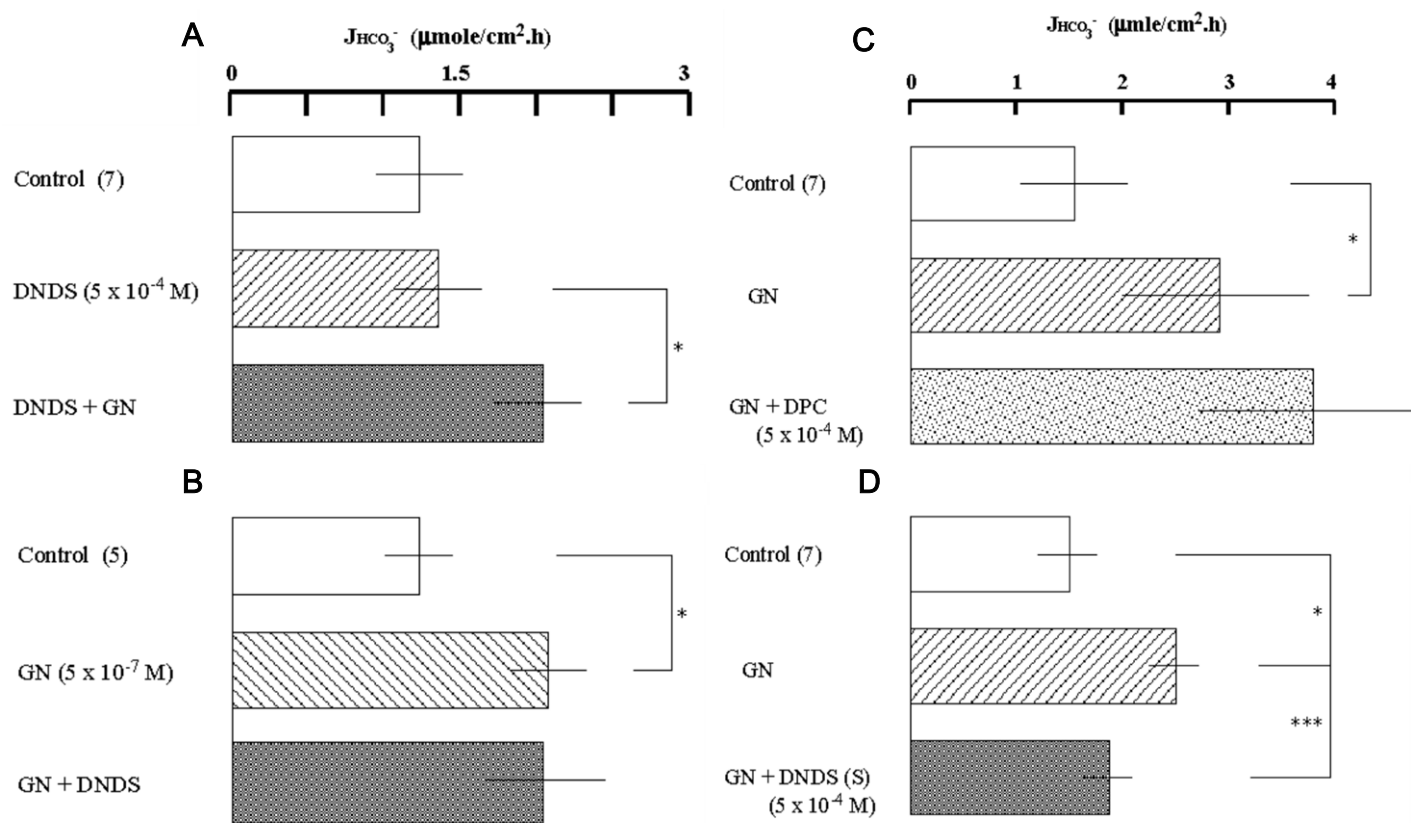

Fig. 4 Takei et al.

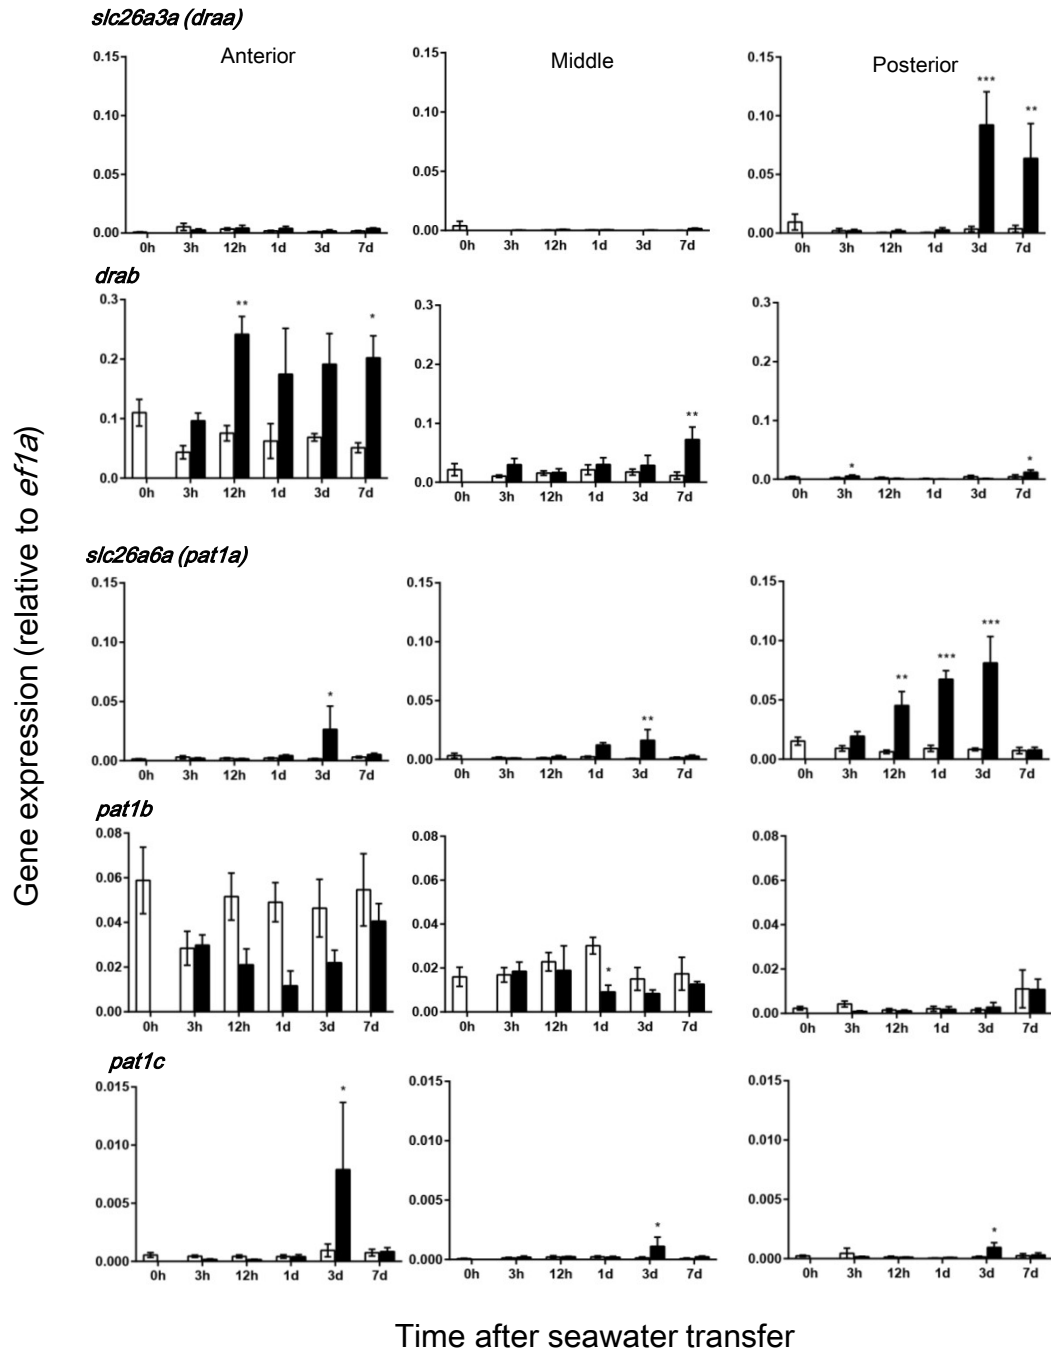

Fig. 5 Takei et al.

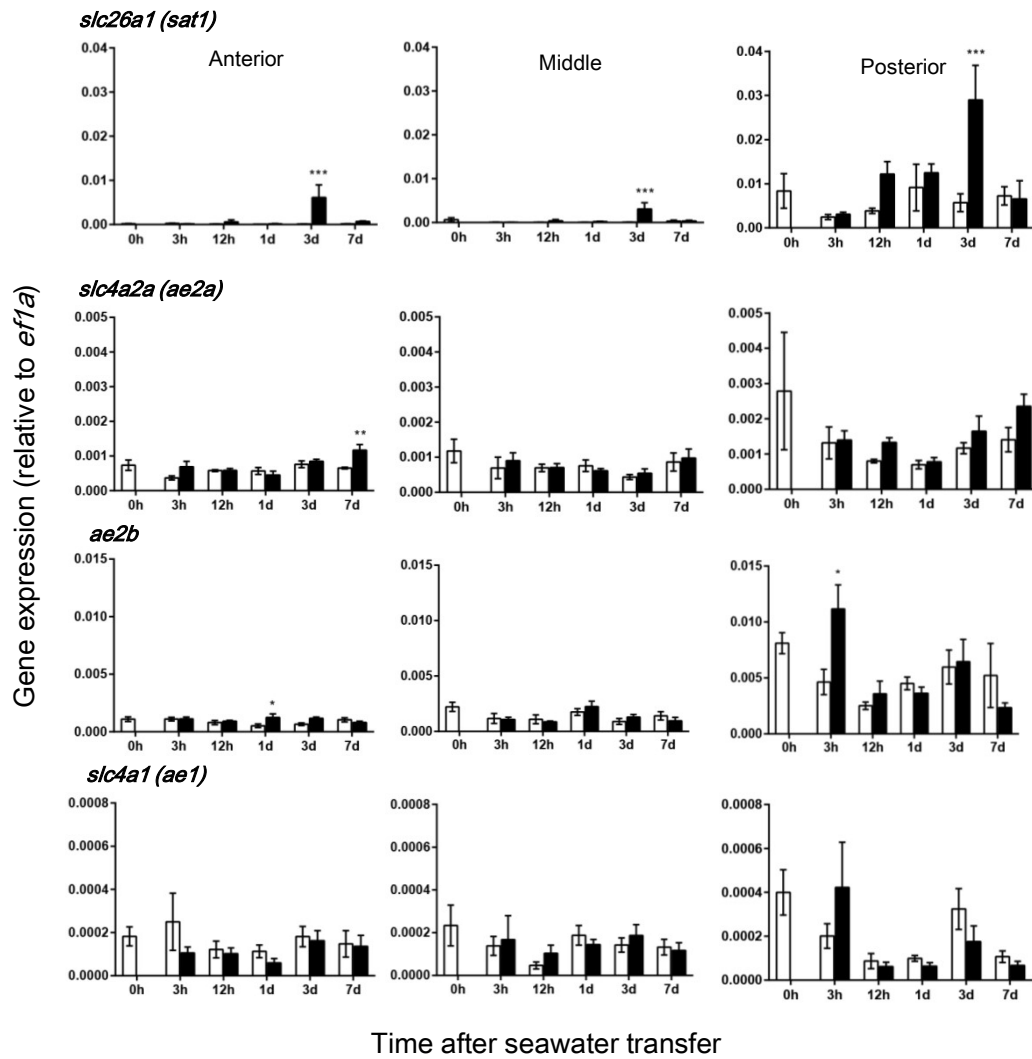

Fig. 6 Takei et al.

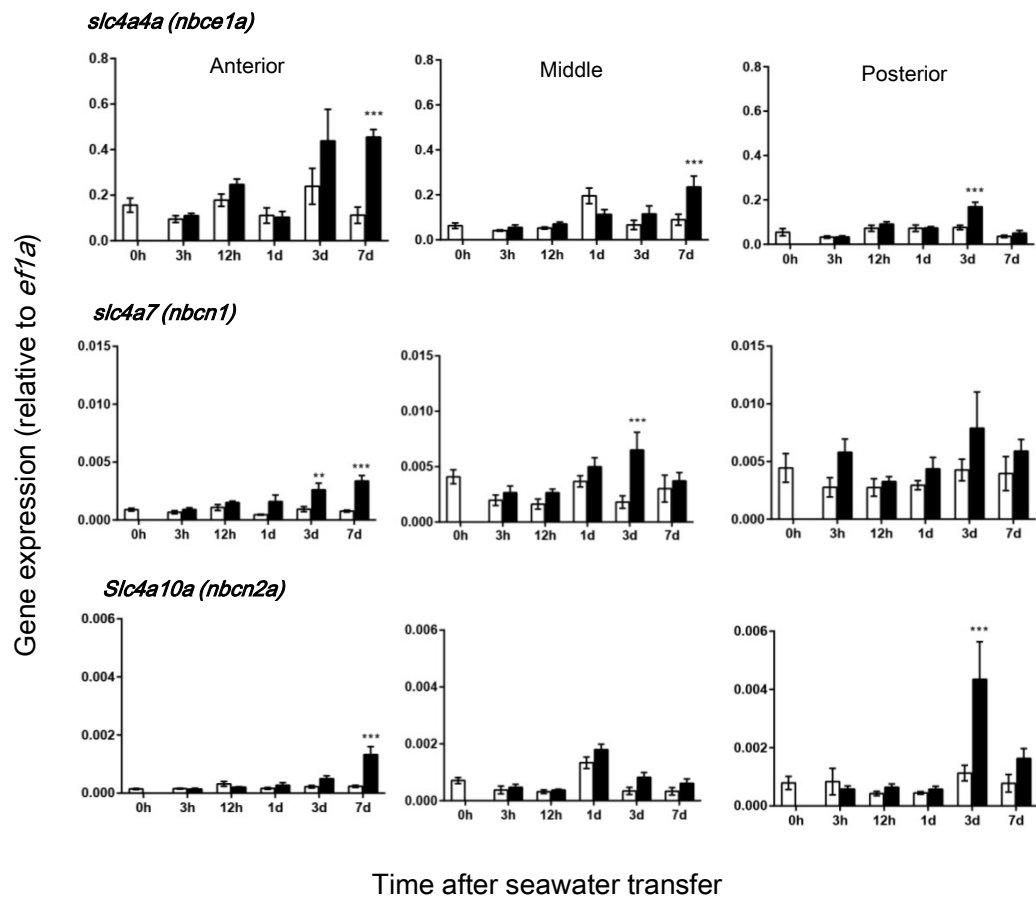

Fig. 7 Takei et al.

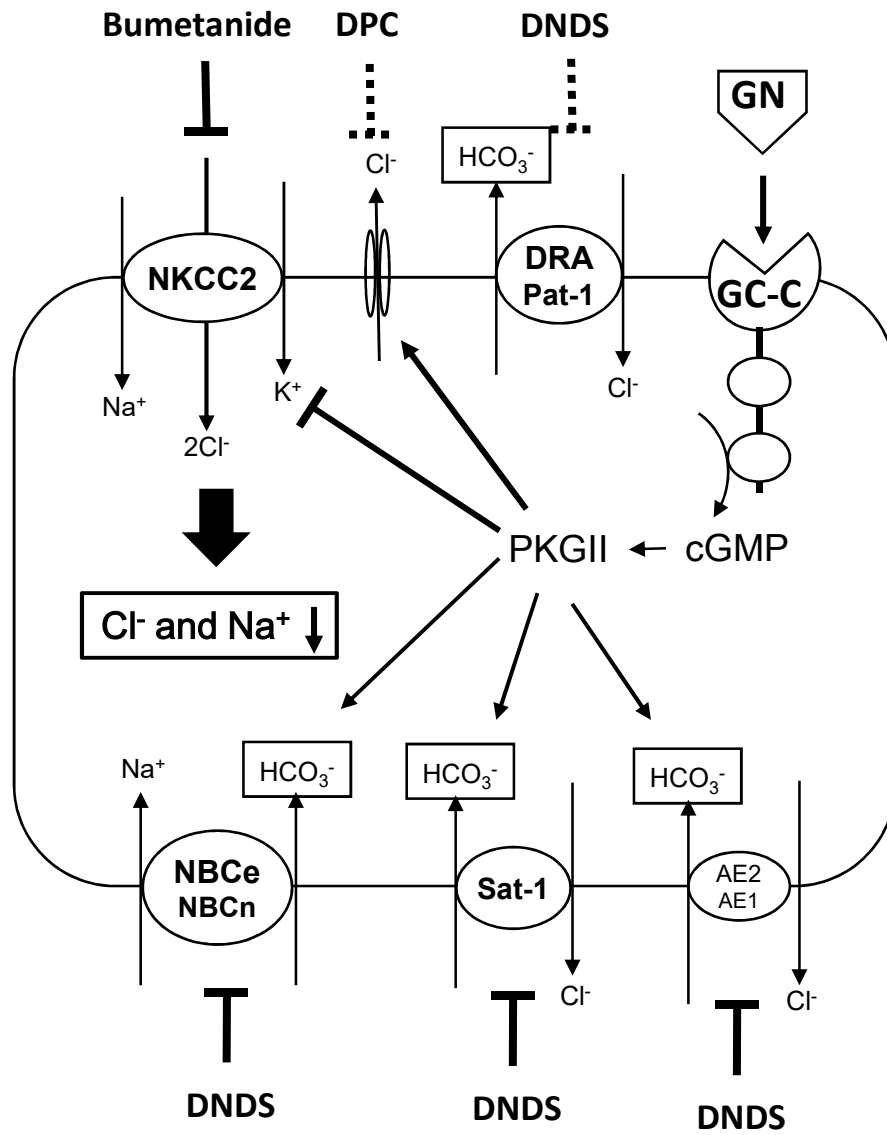

Fig. 8 Takei et al.
